# Supplementary material for: Transcription Factor Sp1 Promotes the Expression of Porcine ROCK1 Gene
Source: PubMed Central journal article supplement (PMC4730353; doi:10.3390/ijms17010112), 2016-01-15
Supplement: ijms-17-00112-s001.pdf [file ijms-17-00112-s001.pdf]

# Supplementary Materials: Transcription Factor Sp1 Promotes the Expression of Porcine *ROCK1* Gene

Ruirui Zhang, Xiaoting Feng, Mengsi Zhan, Cong Huang, Kun Chen, Xiaoyin Tang, Tingting Kang, Yuanzhu Xiong and Minggang Lei

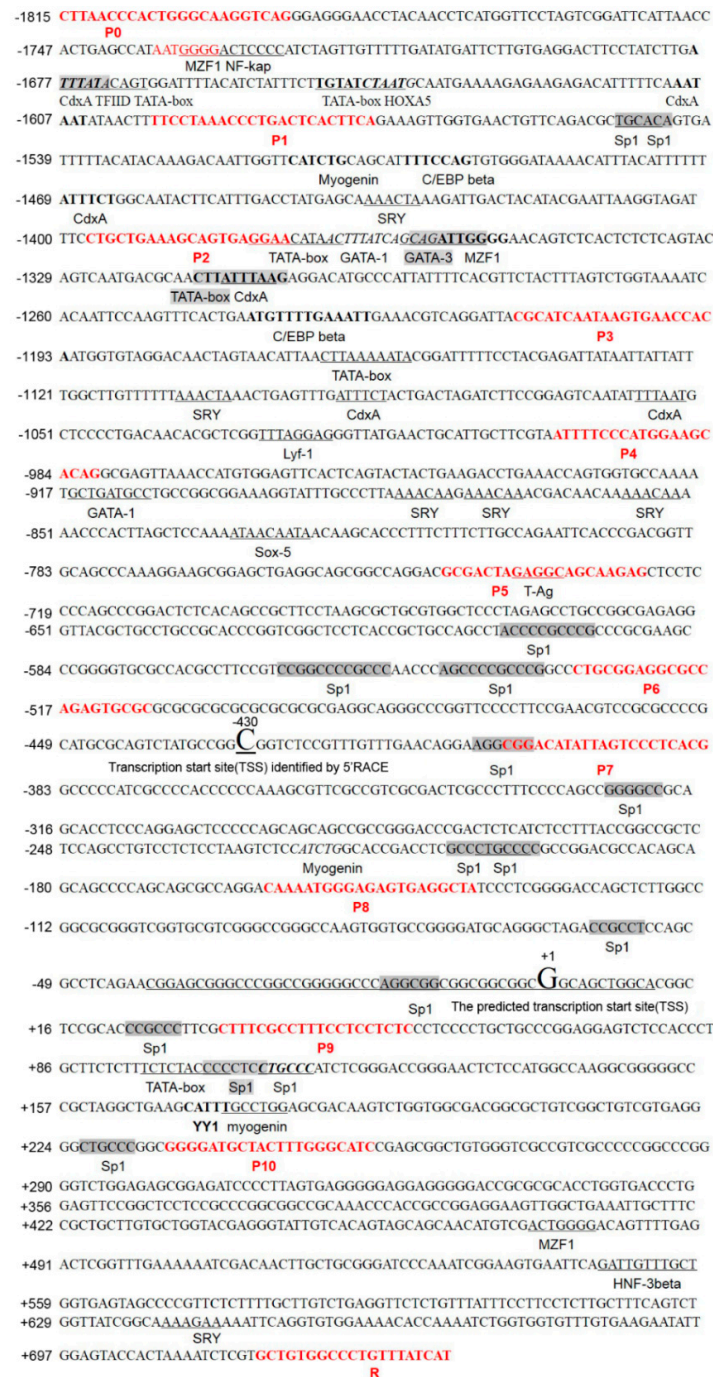

**Figure S1.** Bioinformatic and experimental analysis of 5'-flanking sequence of porcine *ROCK1* gene. Transcription regulatory motifs obtained from bioinformatic analysis were highlighted with different marks. The primer positions for 5'-deletions were labeled in red color. The transcription start site (TSS) identified by 5'-RCAE and the predicted one were shown in larger font. In addition, the predicted one was set as +1. The Sp1 binding sites in *ROCK1*-P5 were shaded.

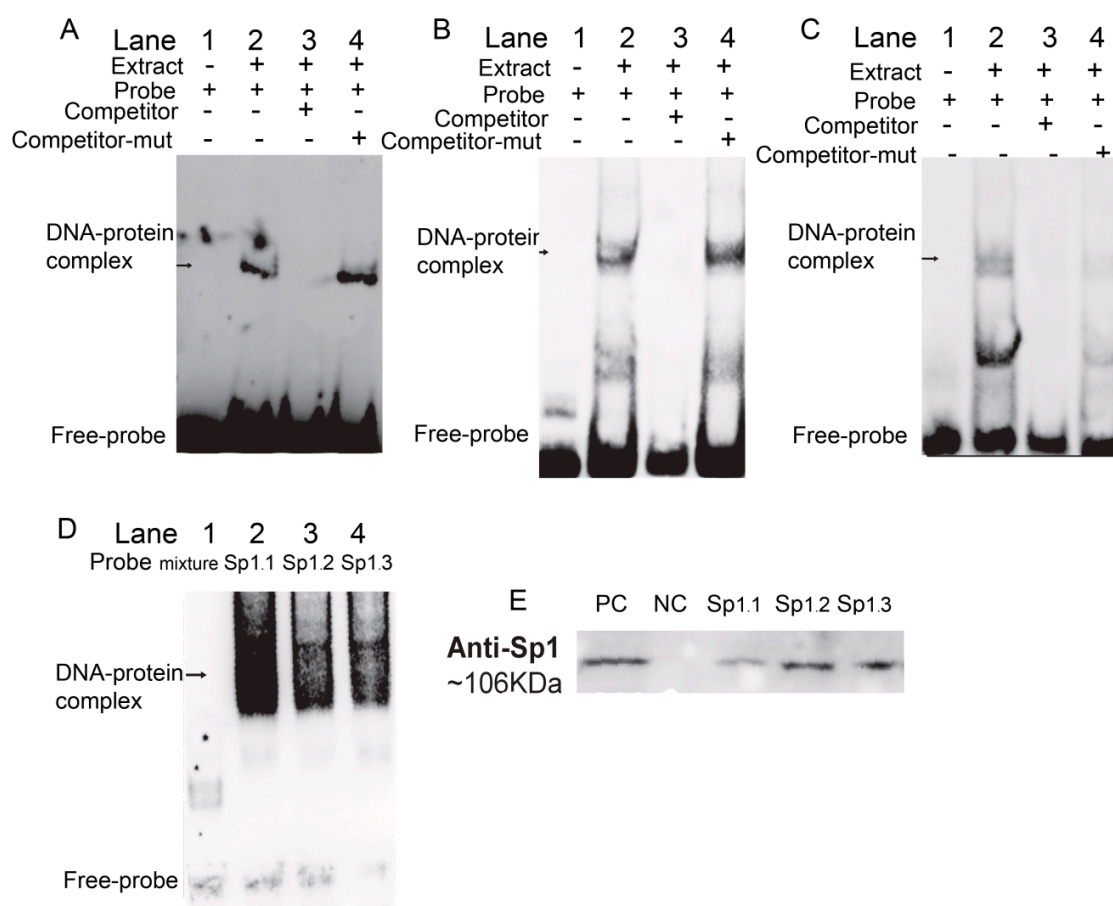

**Figure S2.** *In vitro* binding of Sp1 with the *ROCK1* promoter was analyzed in LM of pig. (A–C) The first, second and third biotin-labeled probes were incubated with LM NE under the same condition of PK cells; (D) The probes of the three Sp1 binding sites were incubated separately with LM NE; (E) Proteins of porcine LM from DNA-pull down materials were examined by Western blot analysis. The three potential Sp1 binding sites were named as Sp1.1-1.3 in (D,E). The competitor/competitor-mutant probes were 50-fold excess and arrows indicated the specific DNA–protein complex bands.

**Table S1.** Primers for 5'RACE, qRT-PCR and ChIP amplification.

| Primer Name           | Sequence (5'-3')                                  |
|-----------------------|---------------------------------------------------|
| UP                    | CTAATACGACTCACTATAGGGCAAGCA<br>GTGGTATCAACGCAGAGT |
| NUP                   | AAGCAGTGGTATCAACGCAGAGT                           |
| 5'RACE-F              | ACAGCGCCGTCGCCACCAGACTT                           |
| 5'RACE-R              | GGACAGGCTGGAGAGCGGCCGGTAA                         |
| mus-β-Actin-qRT-PCR-F | GCCTCACTGTCCACCTTCCA                              |
| mus-β-Actin-qRT-PCR-R | AGCCATGCCAATGTTGTCTCTT                            |
| mus-Sp1-qRT-PCR-F     | TCTTCAGGCCCTTCAAGCAG                              |
| mus-Sp1-qRT-PCR-R     | CTGCCAACTGACCTGTCCAT                              |
| mus-ROCK1-qRT-PCR-F   | GGCTATTATGGACGAGA                                 |
| mus-ROCK1-qRT-PCR-R   | GAAGGCACAAATGAGAT                                 |
| mus-MYOD-qRT-PCR-F    | GACTTCTATGATGACCCGTGTTTC                          |
| mus-MYOD-qRT-PCR-R    | TCAGCGTTGGTGGTCTTGC                               |

**Table S1.** Cont.

| Primer Name         | Sequence (5'-3')      |
|---------------------|-----------------------|
| mus-Myog-qRT-PCR-F  | CTACAGGCCTTGCTCAGCTC  |
| mus-Myog-qRT-PCR-R  | ACGATGGACGTAAGGGAGTG  |
| mus-MyHC-qRT-PCR-F  | CAAGTCATCGGTGTTTGTGG  |
| mus-MyHC-qRT-PCR-R  | TGTCGTA CTTGGGCGGGTTC |
| sus-Sp1-qRT-PCR-F   | ACCATGAGCGACCAAGATCA  |
| sus-Sp1-qRT-PCR-R   | CTGTGTGGCTGTGAGGTCAA  |
| sus-ROCK1-qRT-PCR-F | CCACGTTAAGTGCCACAGAG  |
| sus-ROCK1-qRT-PCR-R | TGTTTCATCCTGAGAACATGC |
| ChIP-Sp1-F          | CACCGCTGCCAGCCTAC     |
| ChIP-Sp1-R          | ACTCTGGCGCCTCCGCA     |

**Table S2.** Primers for 5'-deletion of porcine *ROCK1* promoter and Sp1 CDS amplification.

| Primer Name      | Sequence (5'-3')                |
|------------------|---------------------------------|
| ROCK1-P0         | CTTAACCCACTGGGCAAGGTCAG         |
| ROCK1-R          | ATGATAAACAGGGCCACAGC            |
| ROCK1-P0-KpnI    | GGGGTACCCTTAACCCACTGGGCAAGGTCAG |
| ROCK1-P1-KpnI    | GGGGTACCCTTCTAAACCCTGACTCACTCA  |
| ROCK1-P2-KpnI    | GGGGTACCCTGCTGAAAGCAGTGAGGAA    |
| ROCK1-P3-KpnI    | GGGGTACCCGCATCAATAAGTGAACCACA   |
| ROCK1-P4-KpnI    | GGGGTACCATTTTCCCATGGAAGCACAG    |
| ROCK1-P5-KpnI    | GGGGTACCGCGACTAGAGGCAGCAAGAG    |
| ROCK1-P6-KpnI    | GGGGTACCCTGCGGAGGGCGCCAGAGT     |
| ROCK1-P7-KpnI    | GGGGTACCCGGACATATTAGTCCCTCAGC   |
| ROCK1-P8-KpnI    | GGGGTACCCAAAATGGGAGAGTGAGGCTA   |
| ROCK1-P9-KpnI    | GGGGTACCCTTTCGCCTTTCCTCCTCTC    |
| ROCK1-P10-KpnI   | GGGGTACCGGGATGCTACTTTGGGCATC    |
| ROCK1-R-Hind III | CCCAAGCTTATGATAAACAGGGCCACAGC   |
| Sp1-F            | CCCAAGCTTATGAGCGACCAAGATCACTCC  |
| Sp1-R            | GGGGTACCCTCAGAAGCCATTGCCACTGAT  |

**Table S3.** Oligo sequences used for EMSA and site-directed mutation.

| Oligo Name  | Sequence (5'-3')                   |
|-------------|------------------------------------|
| Sp1-1-F-bio | CTGCCAGCCTACCCCGCCCCGCCGCGAAGC-bio |
| Sp1-1-R-bio | GCTTCGCGGGCGGGCGGGGTAGGCTGGCAG-bio |
| Sp1-1-F     | CTGCCAGCCTACCCCGCCCCGCCGCGAAGC     |
| Sp1-1-R     | GCTTCGCGGGCGGGCGGGGTAGGCTGGCAG     |
| Sp1-Mut-1-F | CTGCCAGCCTACCCCTCCCGCCCCGCCGCGAAGC |
| Sp1-Mut-1-R | GCTTCGCGGGCGGGAGGGGTAGGCTGGCAG     |
| Sp1-2-F-bio | CGCCTTCCGTCCGGCCCCGCCAACCAGC-bio   |
| Sp1-2-R-bio | GCTGGGTTGGGCGGGGCCGGACGGAAGGCG-bio |
| Sp1-2-F     | CGCCTTCCGTCCGGCCCCGCCAACCAGC       |
| Sp1-2-R     | GCTGGGTTGGGCGGGGCCGGACGGAAGGCG     |
| Sp1-Mut-2-F | CGCCTTCCGTCCGGTTTGCCCAACCAGC       |

**Table S3.** *Cont.*

| <b>Oligo Name</b> | <b>Sequence (5'-3')</b>            |
|-------------------|------------------------------------|
| Sp1-Mut-2-R       | GCTGGGTTGGGCGAAACCGGACGGAAGGCG     |
| Sp1-3-F-bio       | CGCCCAACCCAGCCCCGCCCGGCCCTGCGG-bio |
| Sp1-3-R-bio       | CCGCAGGGCCGGGCGGGGCTGGGTTGGGCG-bio |
| Sp1-3-F           | CGCCCAACCCAGCCCCGCCCGGCCCTGCGG     |
| Sp1-3-R           | CCGCAGGGCCGGGCGGGGCTGGGTTGGGCG     |
| Sp1-Mut-3-F       | CGCCCAACCCAGCTTTGCCCGGCCCTGCGG     |
| Sp1-Mut-3-R       | CCGCAGGGCCGGCAAAGCTGGGTTGGGCG      |

The series of Mut Oligo sequences were also used for site-directed mutation of the Sp1 binding sites in another type of purification.
